# Supplementary material
Source: PubMed Central journal article supplement (PMC8787082)

# Supplementary Figure S3

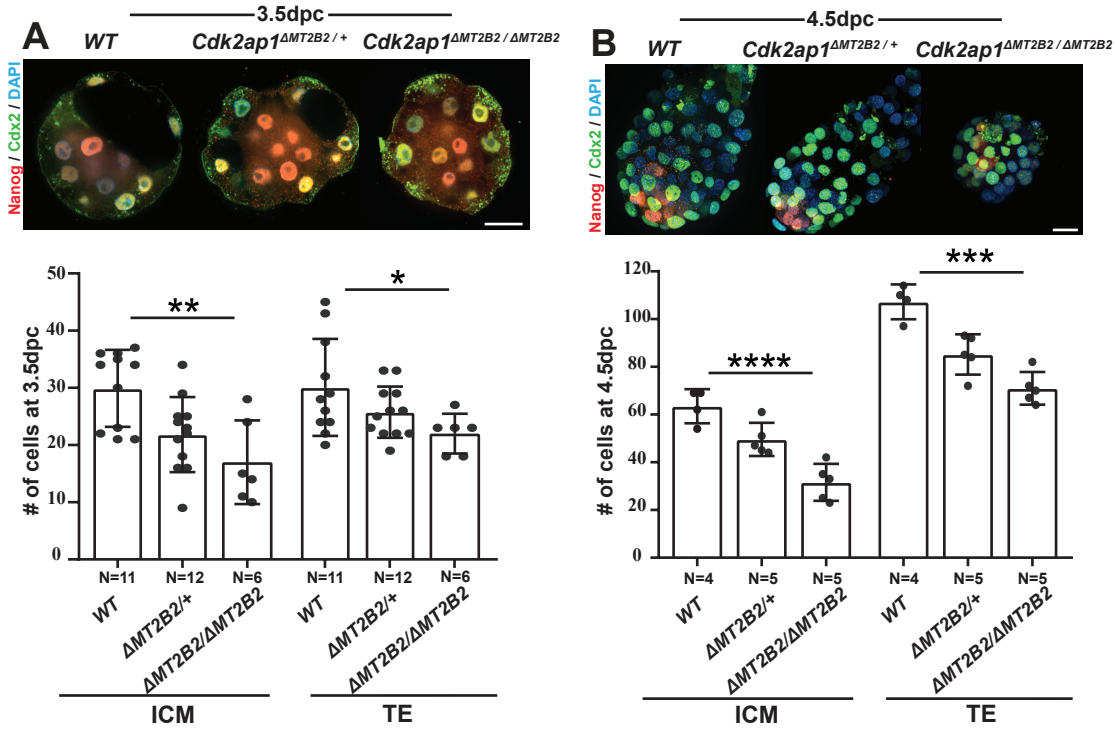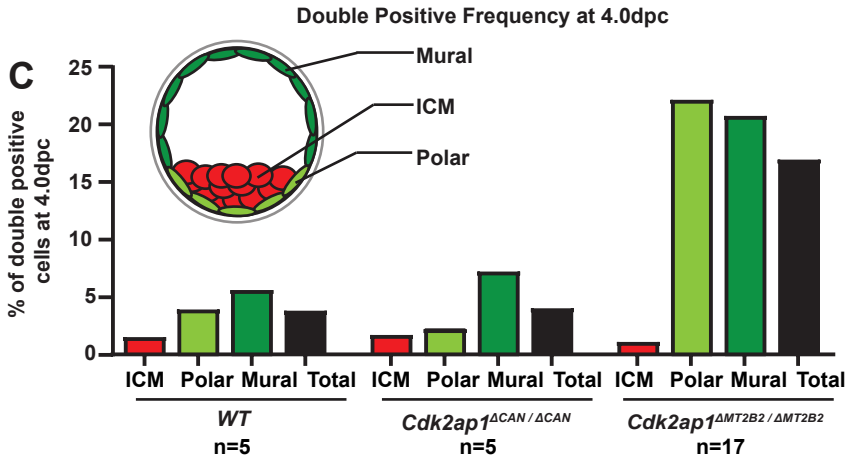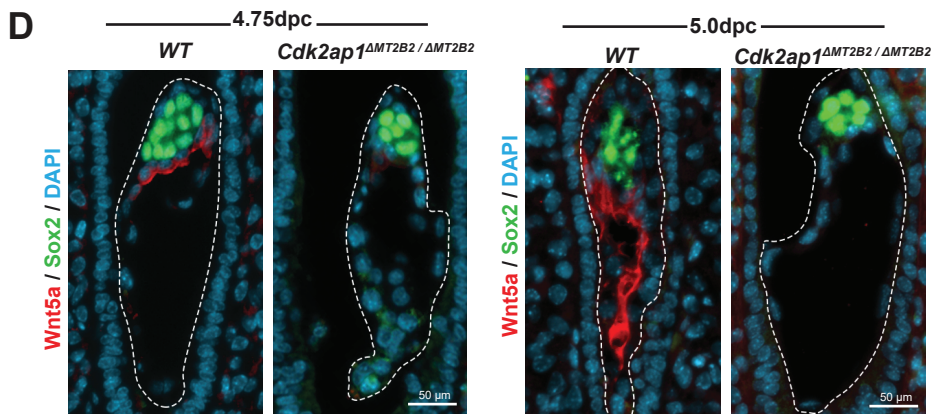

Supplement: NIHMS1756571-supplement-3.pdf [file NIHMS1756571-supplement-3.pdf]

# Supplementary Figure S4

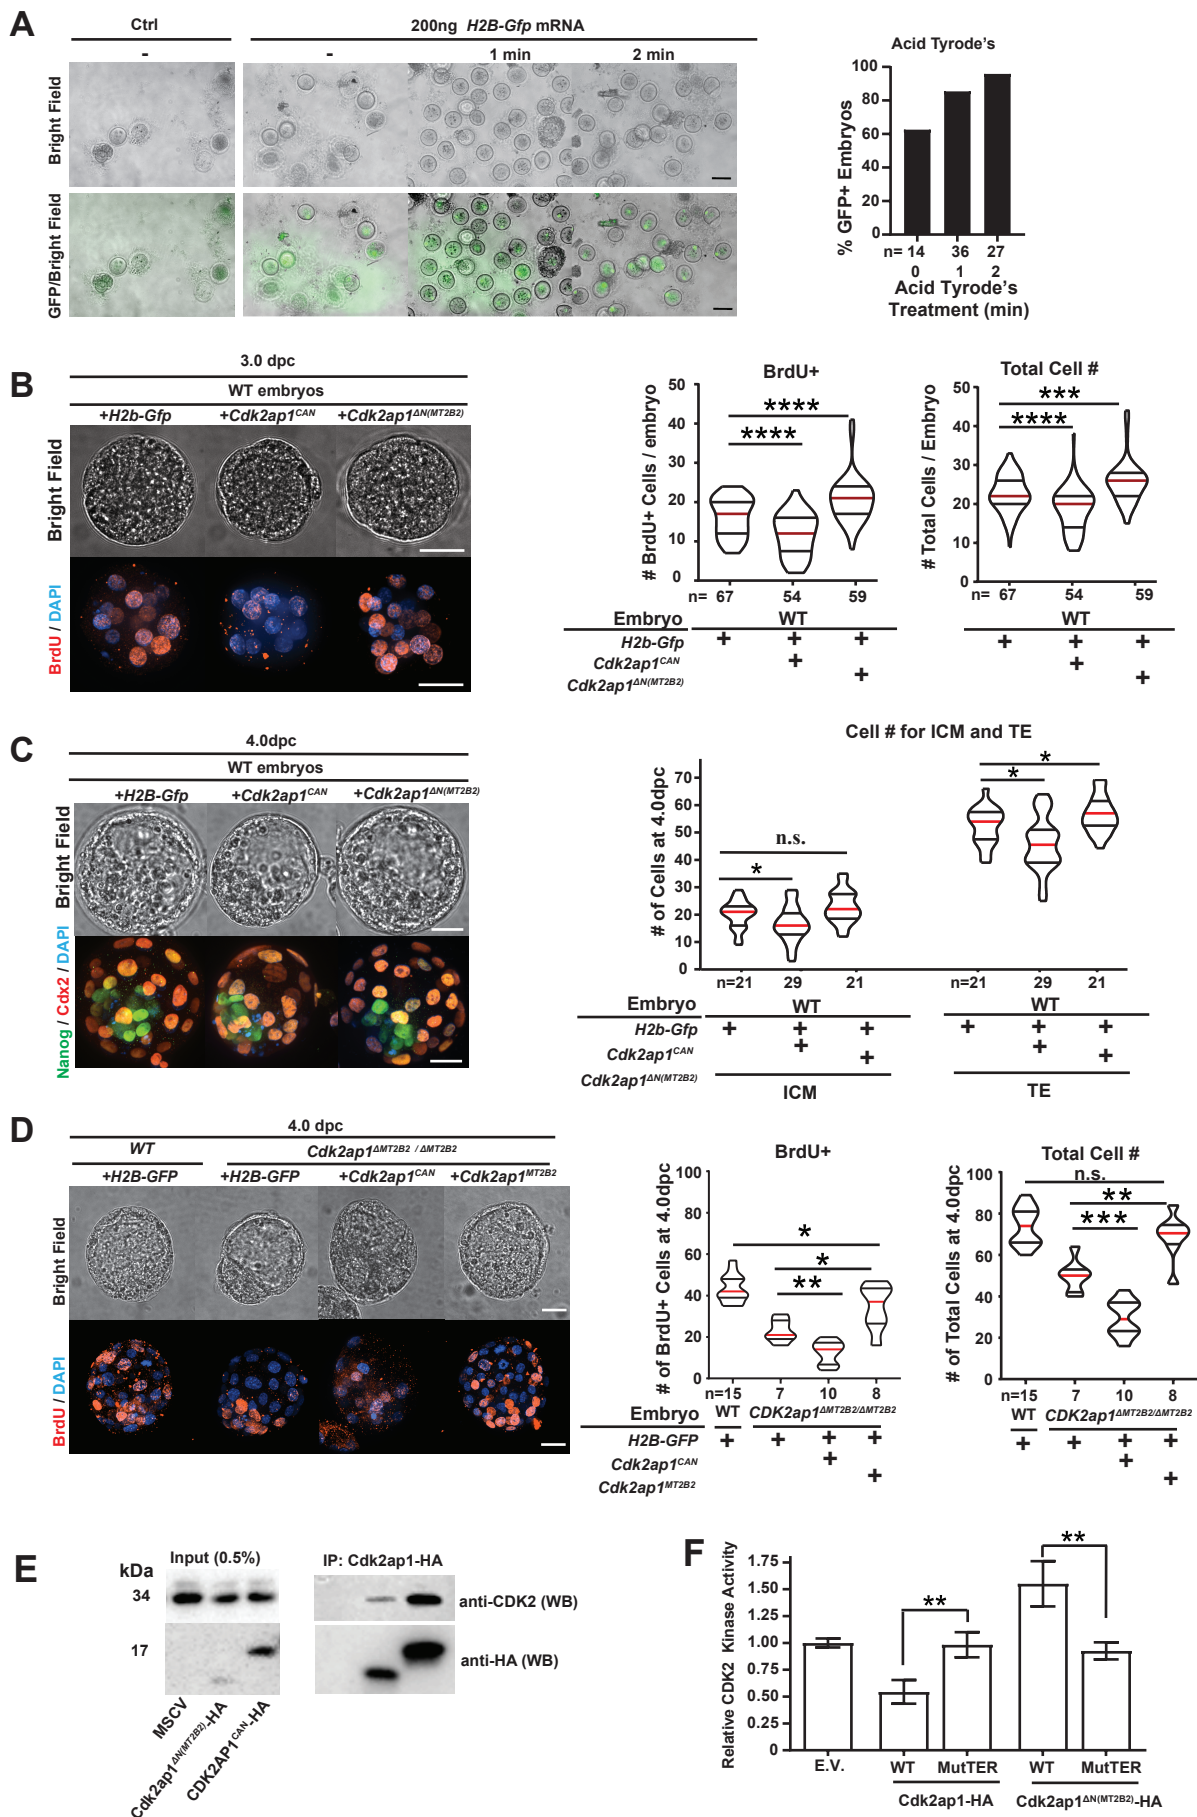

Supplement: NIHMS1756571-supplement-4.pdf [file NIHMS1756571-supplement-4.pdf]

# Supplementary Figure 6

**A**

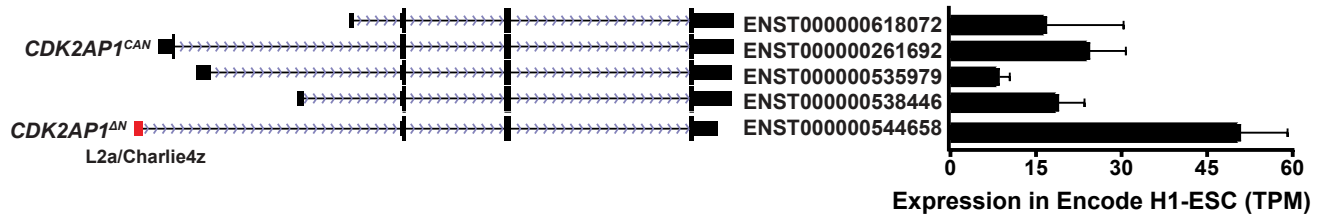

**B**

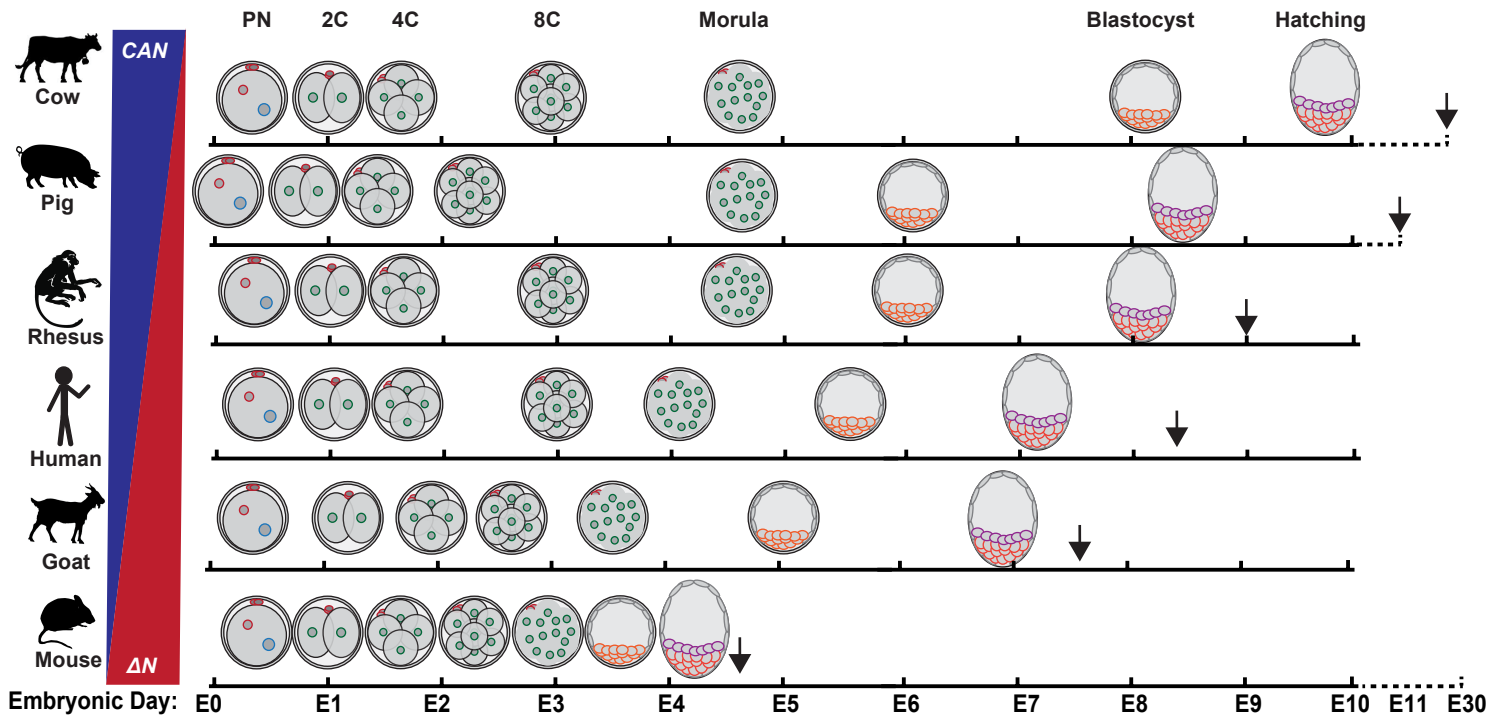

Supplement: NIHMS1756571-supplement-6.pdf [file NIHMS1756571-supplement-6.pdf]
